# Supplementary material for: 2-Boronobenzoic acid functionalized silver nanocubes for label free detection of l-arginine and l-cysteine with real sample applications
Source: Royal Society of Chemistry journal article supplement (doi:10.1039/d4nj02897j), 2024-01-01
Supplement: d4nj02897j1.pdf [file d4nj02897j1.pdf]

## 2- Borono benzoic acid functionalized silver nanocubes for the label free detection of L-Arginine and L-Cysteine with real sample applications.

Saumya Singh<sup>a</sup>, K.K. Upadhyay<sup>a\*</sup>

<sup>a</sup> Department of Chemistry, Institute of Science, Banaras Hindu University, Varanasi

\*Corresponding Author

| <b>S.No.</b> | <b>Caption</b>                                                                                                                                                                                                                                                                                                                                                                                                                                                                                                                                       | <b>Page No.</b> |
|--------------|------------------------------------------------------------------------------------------------------------------------------------------------------------------------------------------------------------------------------------------------------------------------------------------------------------------------------------------------------------------------------------------------------------------------------------------------------------------------------------------------------------------------------------------------------|-----------------|
| 1.           | <b>Fig. S1</b> Blank studies performed in the absence of (a) AgNO <sub>3</sub> , (b) 2-Formylphenylboronic acid and inset showing corresponding images.                                                                                                                                                                                                                                                                                                                                                                                              | 3               |
| 2.           | <b>Fig. S2</b> (a) AFM image of AgNCs, (b) AFM image of AgNCs + L-Arg, (c) AFM image of AgNCs + L-Cys.                                                                                                                                                                                                                                                                                                                                                                                                                                               | 4               |
| 3.           | <b>Fig. S3</b> (a) EDX spectra of AgNCs, (b) EDX spectra of AgNCs + L-Arg, (c) EDX spectra AgNCs + L-Cys.                                                                                                                                                                                                                                                                                                                                                                                                                                            | 5               |
| 4.           | <b>Fig. S4</b> XPS spectra of AgNCs, AgNCs + L-Arg and AgNCs + L-Cys (a) XPS survey spectra, (b) High resolution B 1s spectra, (c) High resolution Ag 3d spectra, (d) High resolution O 1s spectra (e) High resolution N 1s spectra                                                                                                                                                                                                                                                                                                                  | 6               |
| 5.           | <b>Fig. S5</b> FT-IR spectra of AgNCs, L-Arg, AgNCs+L-Arg, L-Cys, AgNCs+L-Cys.                                                                                                                                                                                                                                                                                                                                                                                                                                                                       | 7               |
| 6.           | <b>Table S1.</b> Assignment of IR bands                                                                                                                                                                                                                                                                                                                                                                                                                                                                                                              | 7               |
| 7.           | <b>Fig. S6</b> (a) Visual response of AgNCs under different pH conditions, (b) UV-Vis spectra showing the effect of pH on AgNCs, (c) Effect of pH on 401 nm, (d) Visual response of AgNCs+L-Arg under different pH conditions, (e) UV-Vis spectra showing effect of pH on AgNCs+L-Arg, (f) The effect of pH on A <sub>520</sub> /A <sub>401</sub> , (g) Visual response of AgNCs + L-Cys under different pH conditions, (h) UV-Vis spectra showing effect of pH on AgNCs + L-Cys, (i) The effect of pH on A <sub>560</sub> /A <sub>401</sub> values. | 8-9             |
|              |                                                                                                                                                                                                                                                                                                                                                                                                                                                                                                                                                      |                 |

|     |                                                                                                                                                                                                                                                                                                                                                                                                                                                                                                                |           |
|-----|----------------------------------------------------------------------------------------------------------------------------------------------------------------------------------------------------------------------------------------------------------------------------------------------------------------------------------------------------------------------------------------------------------------------------------------------------------------------------------------------------------------|-----------|
| 8.  | <b>Fig. S7</b> UV Vis spectral response of synthesized AgNCs in the presence of different ionic concentrations of NaCl and inset showing corresponding image after 30 mins (a) 0.001 M, (b) 0.1 M, (c) 1 M, (d) 2 M, (e) Effect of ionic strength on 401 nm value.                                                                                                                                                                                                                                             | 10        |
| 9.  | <b>Table S2</b> Comparison with previously reported probes for the detection of L-Arg                                                                                                                                                                                                                                                                                                                                                                                                                          | 11        |
| 10. | <b>Table S3</b> Comparison with previously reported probes for the detection of L-Cys                                                                                                                                                                                                                                                                                                                                                                                                                          | 12        |
| 11. | <b>Fig S8.</b> (a) Visual Response of AgNCs in matrix <b>(A)</b> AgNCs, <b>(B)</b> AgNCs+ L-Arg, <b>(C)</b> AgNCs+ L-Cys, <b>(D)</b> AgNCs+ L-Arg+ L-Cys, <b>(E)</b> AgNCs+ mixture of amino acid except L-Arg and L-Cys, <b>(F)</b> AgNCs+ mixture of L-Arg+ L-Cys, <b>(G)</b> AgNCs+ mixture of amino acids including L-Arg except L-Cys, <b>(H)</b> AgNCs +mixture of amino acids including L-Cys except L-Arg, <b>(I)</b> AgNCs+ mixture of amino acids+ L-Arg+ L-Cys and (b) Corresponding UV-Vis spectra | 13        |
| 12. | <b>Scheme S1.</b> Mechanism for the synthesis of AgNCs                                                                                                                                                                                                                                                                                                                                                                                                                                                         | 14        |
| 13. | <b>Fig. S9.</b> HRMS of AgNCs                                                                                                                                                                                                                                                                                                                                                                                                                                                                                  | 15        |
| 13. | <b>Fig. S10.</b> HRMS of AgNCs after the addition of L-Cys                                                                                                                                                                                                                                                                                                                                                                                                                                                     | 16        |
| 14. | <b>Fig. S11:</b> Raman spectrum of AgNCs                                                                                                                                                                                                                                                                                                                                                                                                                                                                       | 17        |
| 15. | <b>Table S4.</b> Raman wavenumbers (cm <sup>-1</sup> ) and intensity (a.u.) and their probable assignments.                                                                                                                                                                                                                                                                                                                                                                                                    | 17        |
| 16. | <b>Fig. S12</b> Raman spectrum of L-Arg                                                                                                                                                                                                                                                                                                                                                                                                                                                                        | 18        |
| 17. | <b>Table S5.</b> Raman and SERS wavenumbers (cm <sup>-1</sup> ) and relative intensities (a.u.) and their probable assignments corresponding to Fig. 6a (Main Text).                                                                                                                                                                                                                                                                                                                                           | 18        |
| 18. | <b>Fig. S13</b> Raman spectrum of L-Cys                                                                                                                                                                                                                                                                                                                                                                                                                                                                        | 19        |
| 19. | <b>Table S6.</b> Raman and SERS wavenumbers (cm <sup>-1</sup> ) and relative intensities (a.u.) and their probable assignments corresponding to Fig. 6b (Main Text).                                                                                                                                                                                                                                                                                                                                           | 19        |
| 20. | <b>Fig. S14</b> Visual response and corresponding UV-Vis spectra after addition of N-methyl L-Cysteine and S- Methyl L Cysteine into AgNCs.                                                                                                                                                                                                                                                                                                                                                                    | 20        |
| 21  | <b>Fig. S15</b> Probable mechanism for change in optical properties at very high and very low pH                                                                                                                                                                                                                                                                                                                                                                                                               | 21-<br>22 |

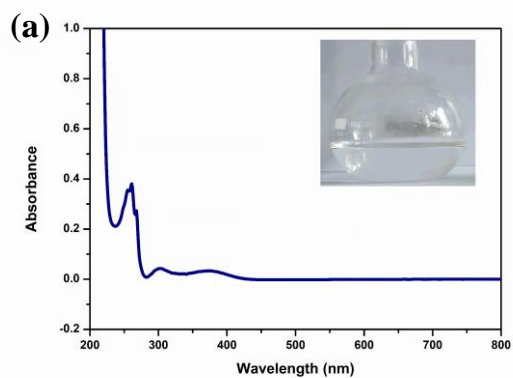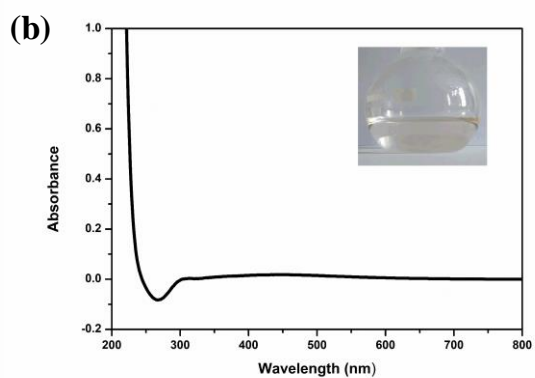

**Fig. S1** Blank studies performed in the absence of (a)  $\text{AgNO}_3$ , (b) 2-Formylphenylboronic acid and inset showing corresponding images.

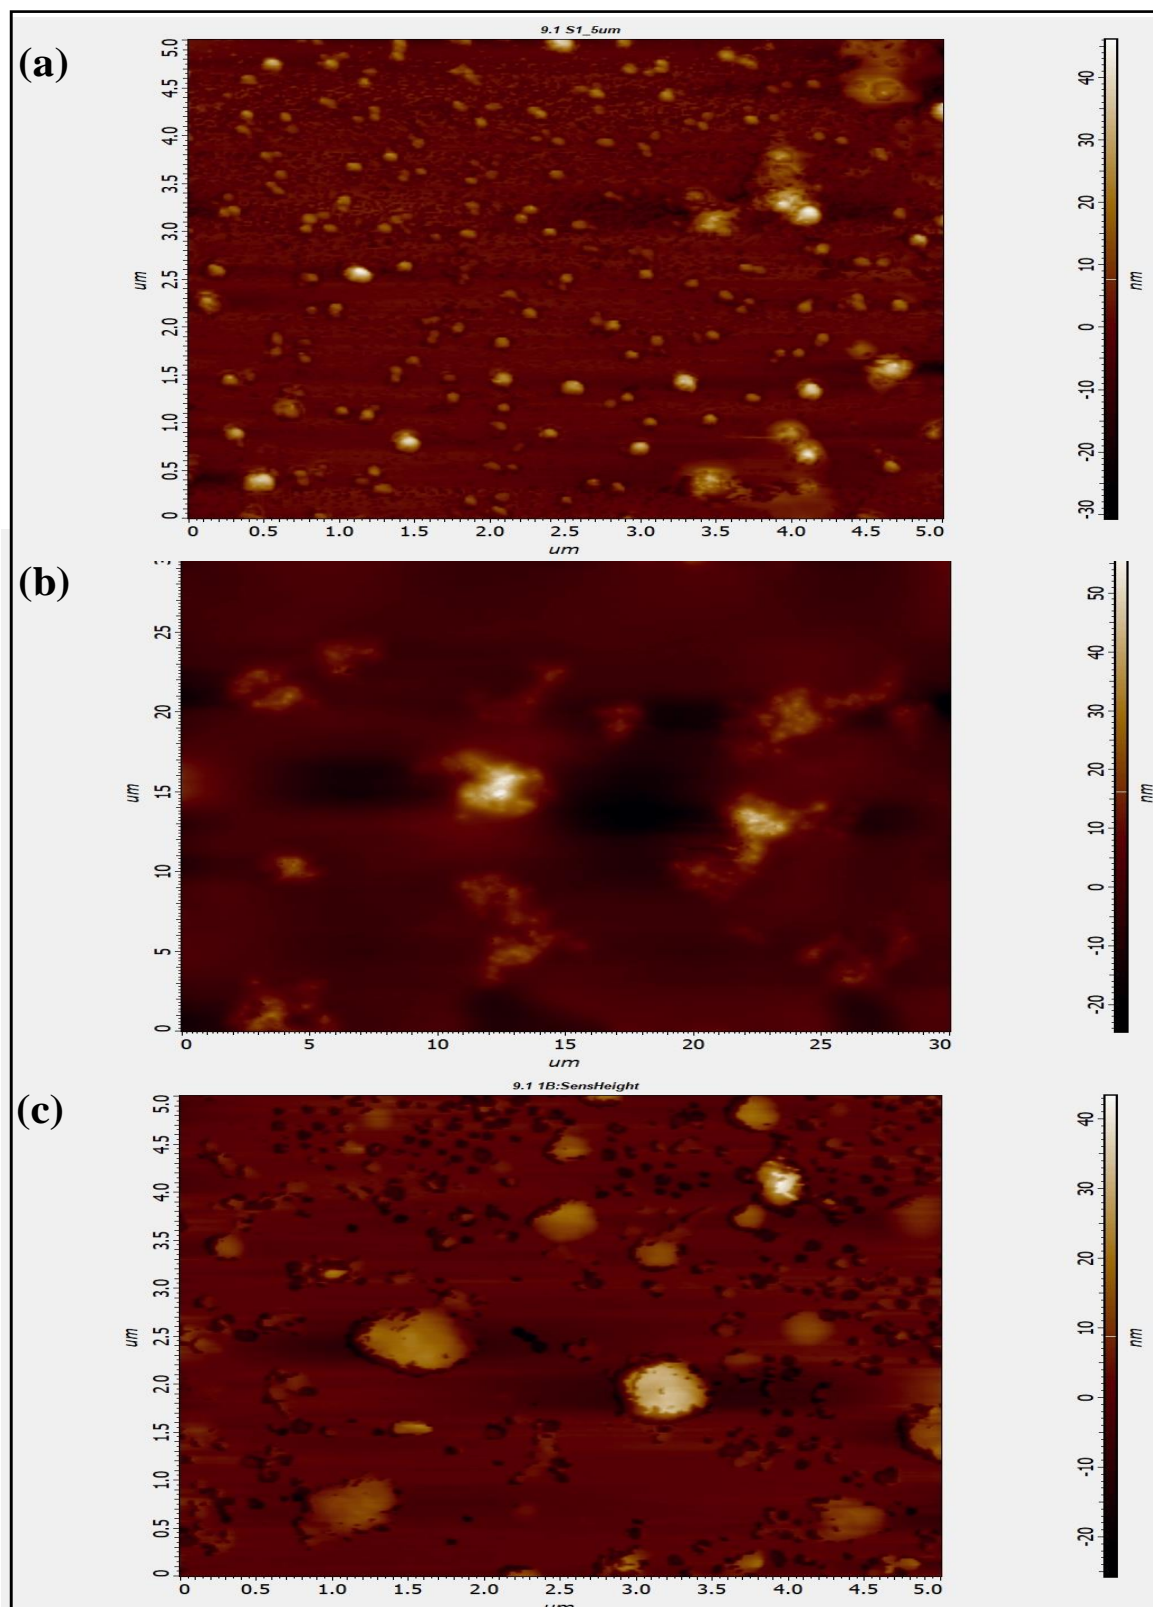

**Fig. S2** (a) AFM image of AgNCs, (b) AFM image of AgNCs+ L-Arg, (c) AFM image of AgNCs + L-Cys.

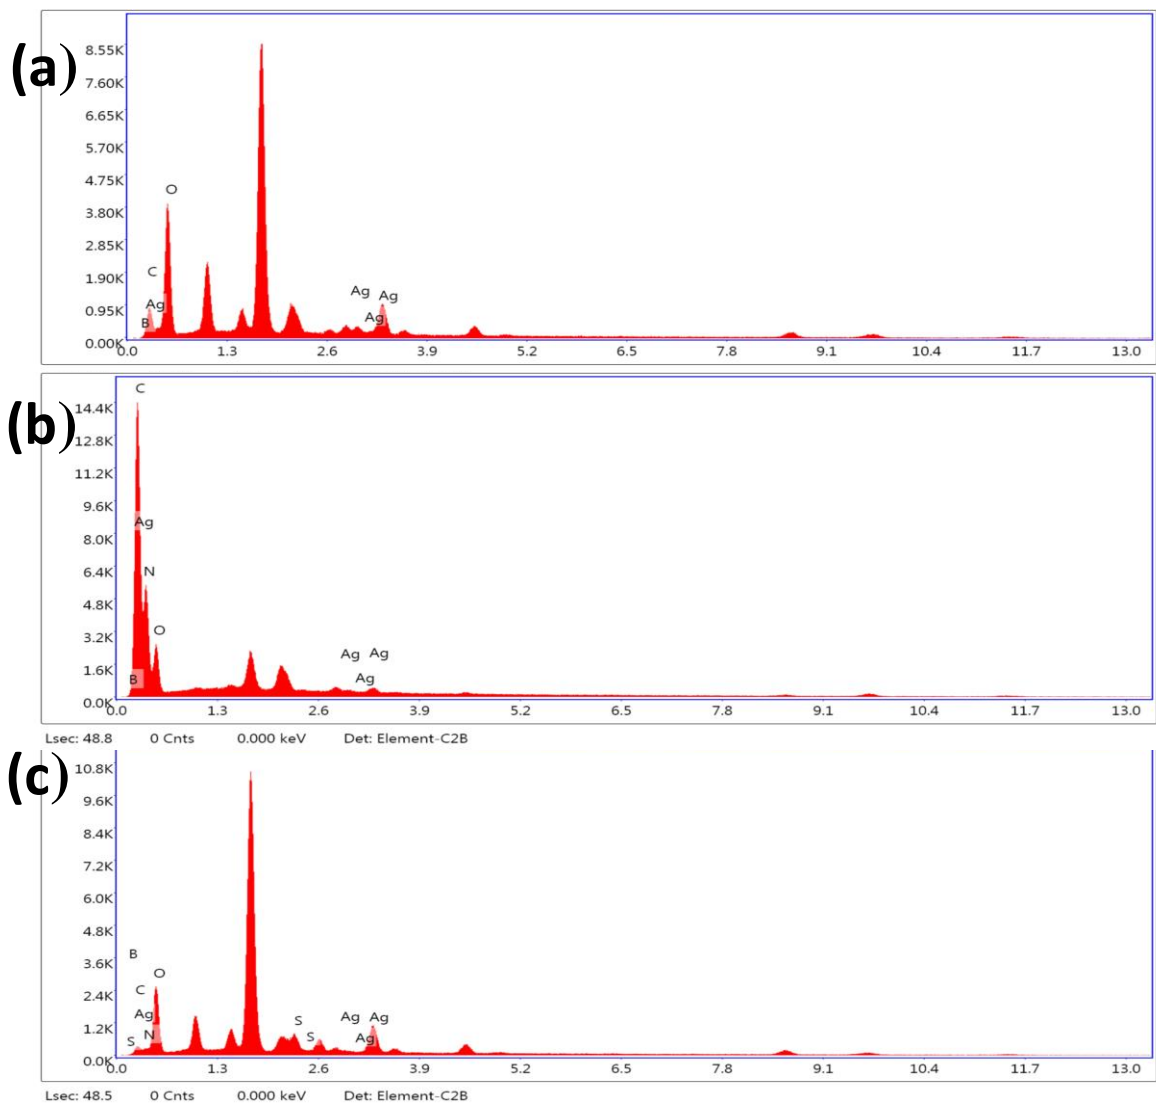

**Fig. S3** (a) EDX spectra of AgNCs, (b) EDX spectra of AgNCs + L-Arg, (c) EDX spectra of AgNCs + L- Cys.

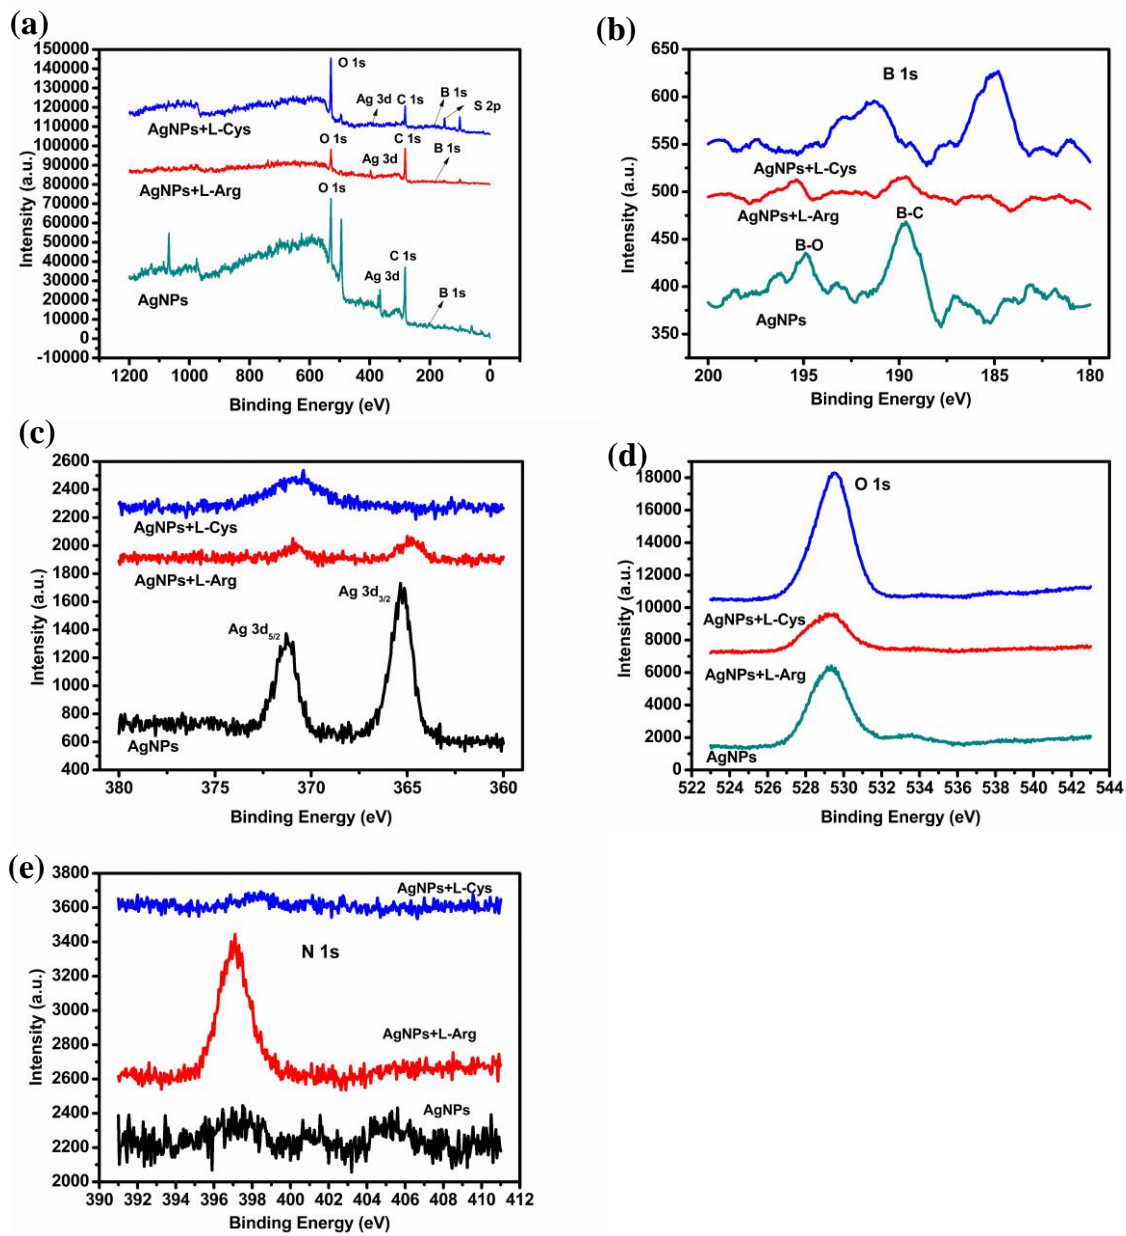

**Fig. S4** XPS spectra of AgNCs, AgNCs + L – Arg and AgNCs + L-Cys (a) XPS survey spectra, (b) High resolution B 1s spectra, (c) High resolution Ag 3d spectra, (d) High resolution O 1s spectra (e) High resolution N 1s Spectra

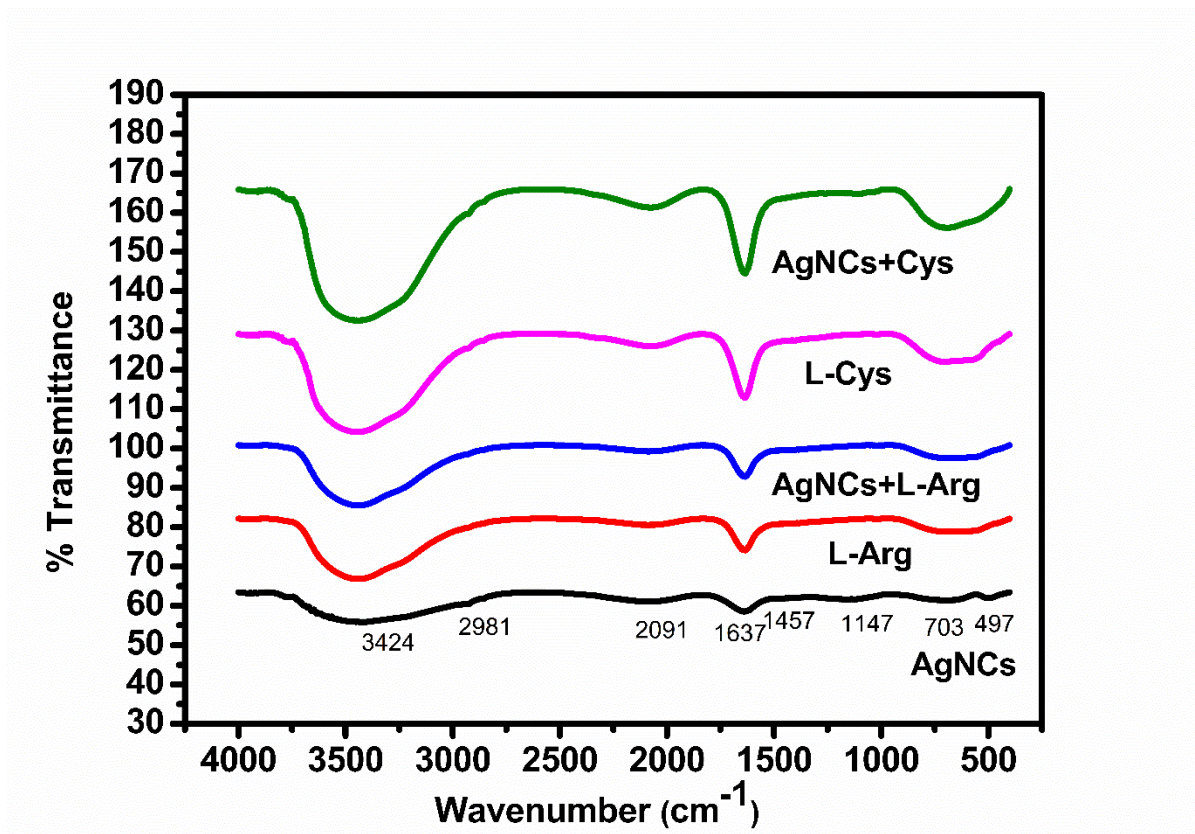

Fig. S5 FT-IR spectra of AgNCs, L- Arg, AgNCs + L-Arg, L- Cys, AgNCs + L-Cys.

Table S1: Assignment of IR bands

| S.No. | Wavenumber (cm <sup>-1</sup> ) | Assignment                                              |
|-------|--------------------------------|---------------------------------------------------------|
| 1.    | 3424                           | O-H asymm                                               |
| 2.    | 2981                           | v C-H phenyl                                            |
| 3.    | 1637                           | Benzene ring vib.+bending vib.                          |
| 4.    | 1457                           | v asymm. B-O + v asymm. C-O                             |
| 5.    | 1147                           | v asymm. C-C                                            |
| 6.    | 703                            | C-H bending                                             |
| 7.    | 497                            | v asymm. Ag-O                                           |
| 8.    | 2091                           | Intramolecular H bond between B-OH and COO <sup>-</sup> |



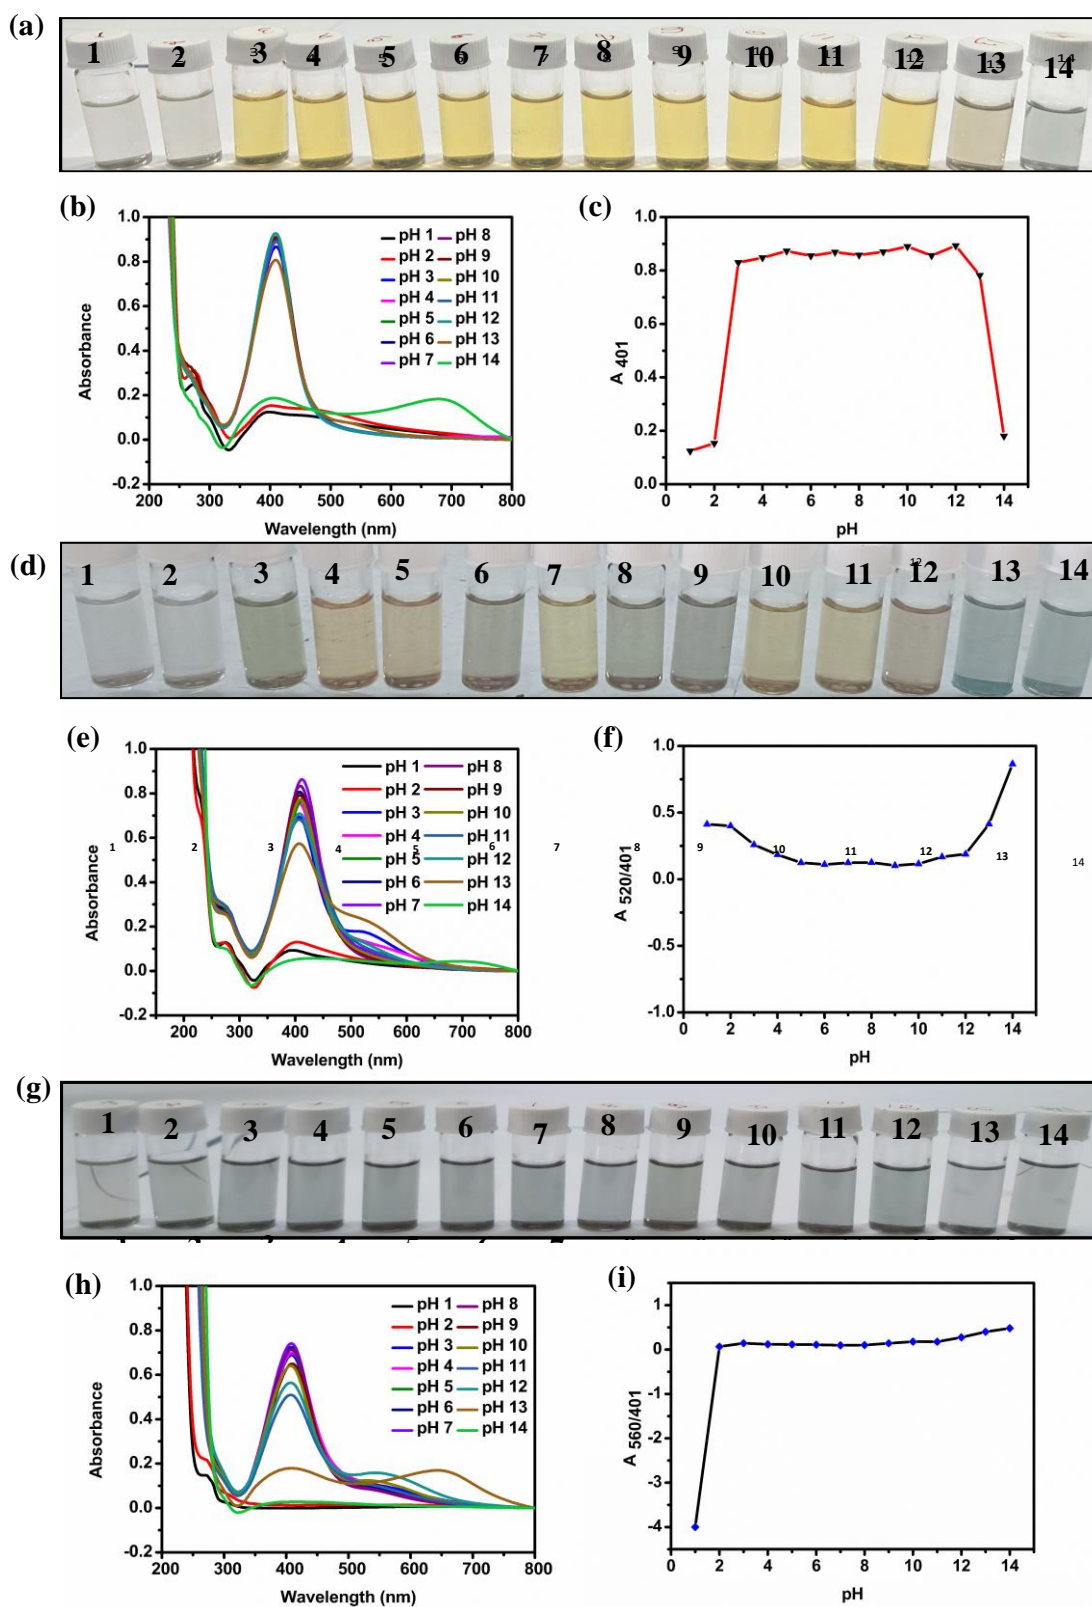

**Fig. S6** (a) Visual response of AgNCs under different pH conditions, (b) UV-Vis spectra showing the effect of pH on AgNCs, (c) Effect of pH on 401 nm, (d) Visual response of AgNCs + L-Arg



under different pH conditions, (e) UV-Vis spectra showing effect of pH on AgNCs + L-Arg, (f) The effect of pH on  $A_{520}/A_{401}$ , (g) Visual response of AgNCs + L-Cys under different pH conditions, (h) UV-Vis spectra showing effect of pH on AgNCs + L-Cys, (i) The effect of pH on  $A_{560}/A_{401}$  values.

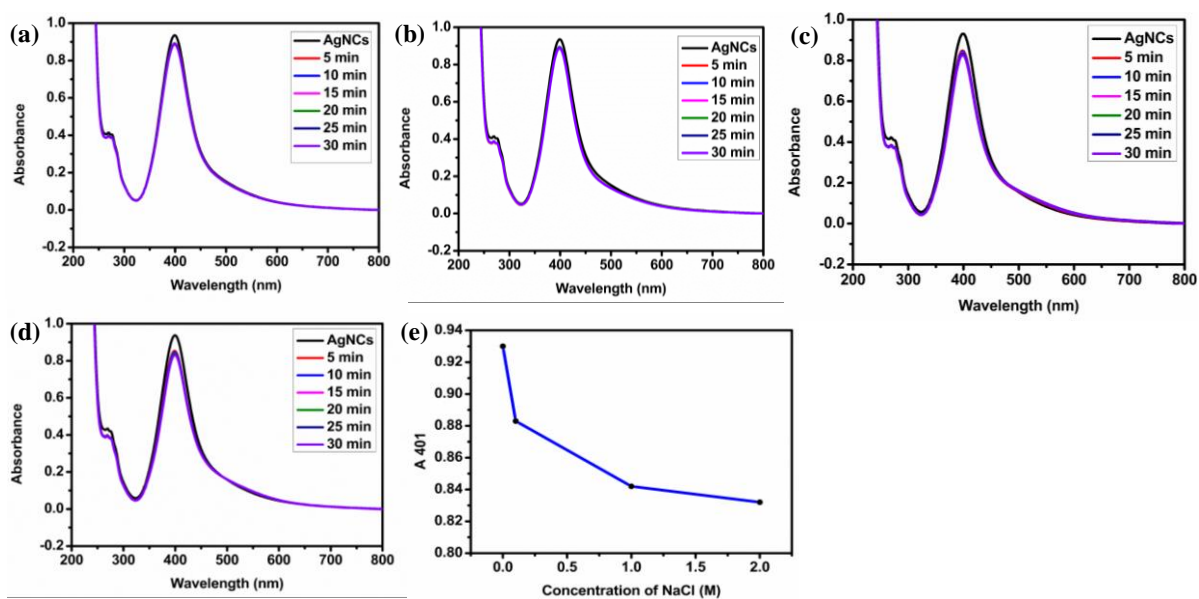

**Fig. S7** UV Vis spectral response of synthesized AgNCs in the presence of different ionic concentrations of NaCl and inset showing corresponding image after 30 mins (a) 0.001 M, (b) 0.1 M, (c) 1 M, (d) 2 M, (e) Effect of ionic strength on 401 nm value.

**Table S2.** Comparison with previously reported probes for the detection of L-Arg

| S.No. | Sensing Material                                                                      | Method       | LOD value    | Selectivity for other analyte | Reference |
|-------|---------------------------------------------------------------------------------------|--------------|--------------|-------------------------------|-----------|
| 1.    | Carbon dots<br>(Spherical)                                                            | Fluorescence | 9.16 $\mu$ M | -                             | 1.        |
| 2.    | P-sulfonatocalix[4]arene thiol functionalized gold nanoparticles<br>(Quasi Spherical) | Colorimetry  | 4 $\mu$ M    | Lysine, Histidine             | 2.        |
| 3.    | 6-aza-2-thiothymine functionalized silver nanoparticles<br>(Spherical)                | Colorimetry  | 2.7 $\mu$ M  | Spermine                      | 3.        |
| 4.    | Silver nanoparticles<br>(Cubic)                                                       | Colorimetry  | 6 $\mu$ M    | Cysteine                      | This work |
| 5.    | Carbon nano-dots<br>(Spherical)                                                       | Fluorescence | 0.26 $\mu$ M | Guanine, Lysine               | 4.        |

## References

1. Y. Wang, H. Liu, H. Song, M. Yu, L. Wei and Z. Li, *New J. Chem.*, 2019, **43**, 13234-13239.
2. G. Patel and S. Menon *Chem. Commun.*, 2009, **24**, 3563-3565.
3. S. K. Kailasa, M. L. Desai, S. H. Baek, T. P. Nguyen, R. Rafique, and T. J. Park, *New J. Chem.*, 2019, **43**, 17069-17077.
4. W. Lu, Y. Gao, Y. Jiao, S. Shuang, C. Li and C. Dong, *Nanoscale*, 2017, **9**, 11545-11552.
5. H. Heli, N. Sattarahmady and M. Hajjizadeh, *Anal. Methods*, 2014, **6**, 6981-6989

**Table S3.** Comparison with previously reported probes for the detection of L-Cys

| S.No. | Material                                                 | Method       | LOD values         | Selectivity for other analyte      | Reference |
|-------|----------------------------------------------------------|--------------|--------------------|------------------------------------|-----------|
| 1.    | Protein coated gold nanoclusters                         | Fluorescence | 9.87 $\mu\text{M}$ | $\text{NO}_3^-$ , $\text{Fe}^{2+}$ | 1         |
| 2.    | Oligonucleotide functionalized gold nanoparticle         | Colorimetry, | 100 nM             | -                                  | 2         |
| 3.    | Cobalt sulphide nanosheets                               | Colorimetry  | 2.7 $\mu\text{M}$  | -                                  | 3         |
| 4.    | Fluorosurfactant capped silver nanoparticles (Spherical) | Colorimetry  | 0.05 $\mu\text{M}$ | -                                  | 4         |
| 5.    | Dextran coated silver nanoparticles (Spherical)          | Colorimetry, | 12 $\mu\text{M}$   | -                                  | 6         |

## References

1. W. Li, X. Wen, H. Zhao, W. Yan, J. F. Trant, and Y. Li, *ACS Appl. Nano Mater.* 2020, 3, 11838–11849
2. J. S. Lee, P. A. Ulmann, M. S. Han, and C. A. Mirin, *Nano Lett.* 2008, 8, 2, 529–533
3. S. Hashmi, M. Singh, P. Weerathunge, E. L. Mayes, P. D. Mariathomas, S.N. Prasad, R. Ramanathan and V. Bansal, *ACS Appl. Nano Mater.*, 2021, 4, 13352-13362.
4. S. Chen, H. Gao, W. Shen, C. Lu, and Q. Yuan, *Sens. Actuators B: Chem.*, 2014. **190**, 673-678
5. S. Davidović, V. Lazić, I. Vukoje, J. Papan, S.P Anhrenkiel, S. Dimitrijević, and J.M. Nedeljković, *Colloids Surf. B: Biointerfaces*, 2017, **160**, 184-191.

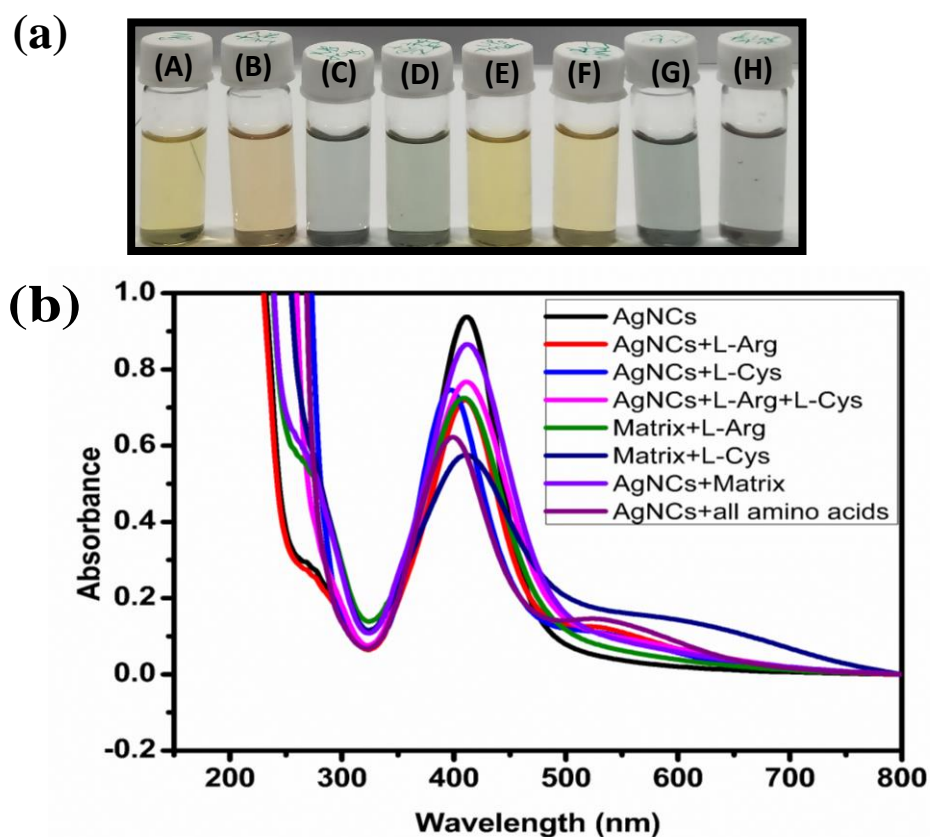

**Figure S8.** (a) Visual Response of AgNCs in matrix (A) AgNCs, (B) AgNCs+ L-Arg, (C) AgNCs+ L-Cys, (D) AgNCs+ L-Arg+ L-Cys, (E) AgNCs+ mixture of amino acid except L-Arg and L-Cys, (F) AgNCs+ mixture of L-Arg+ L-Cys, (G) AgNCs+ mixture of amino acids including L-Arg except L-Cys, (H) AgNCs +mixture of amino acids including L-Cys except L-Arg, (I) AgNCs+ mixture of amino acids+ L-Arg+ L-Cys and (b) Corresponding UV-Vis spectra

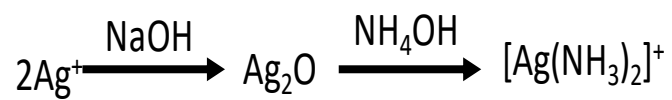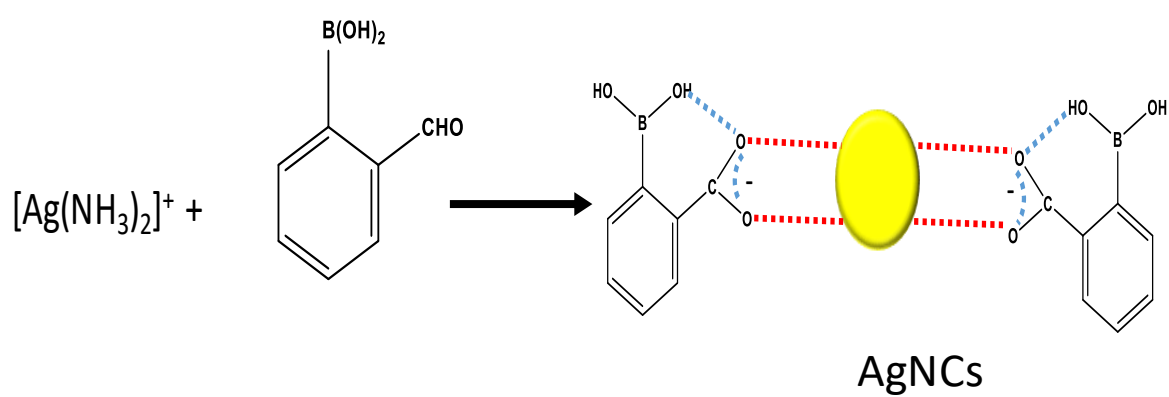

**Scheme S1.** Mechanism for the synthesis of AgNCs



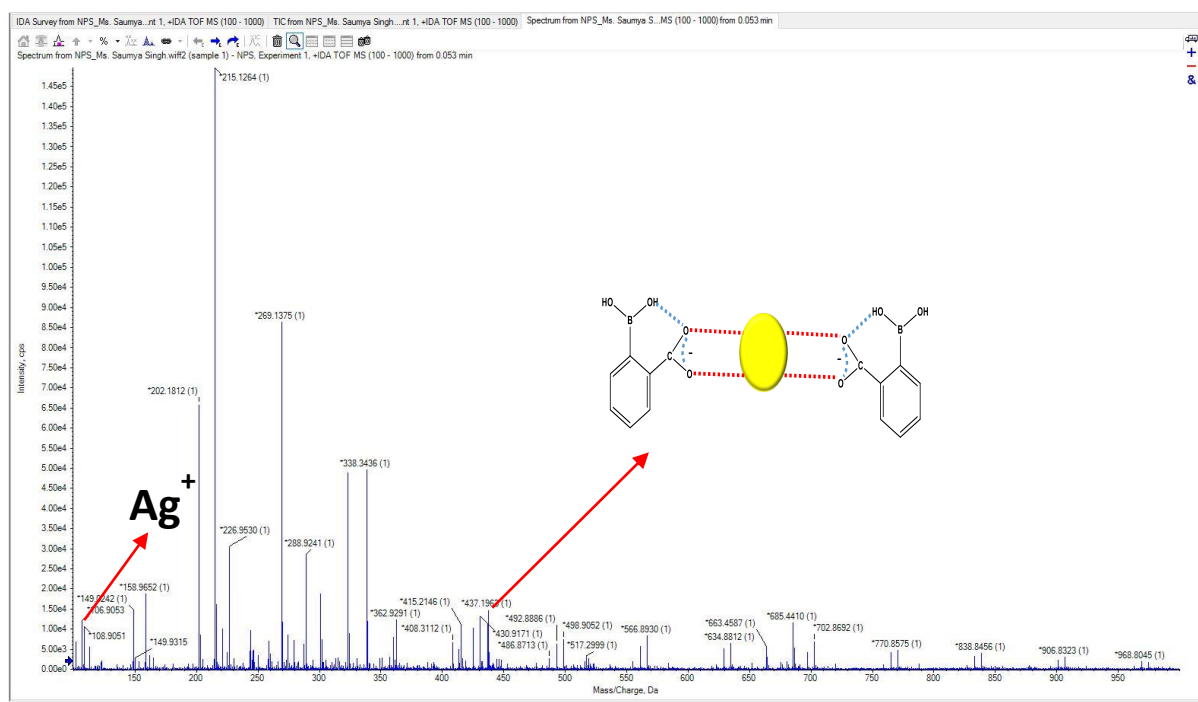

**Fig S9.** HRMS of AgNCs

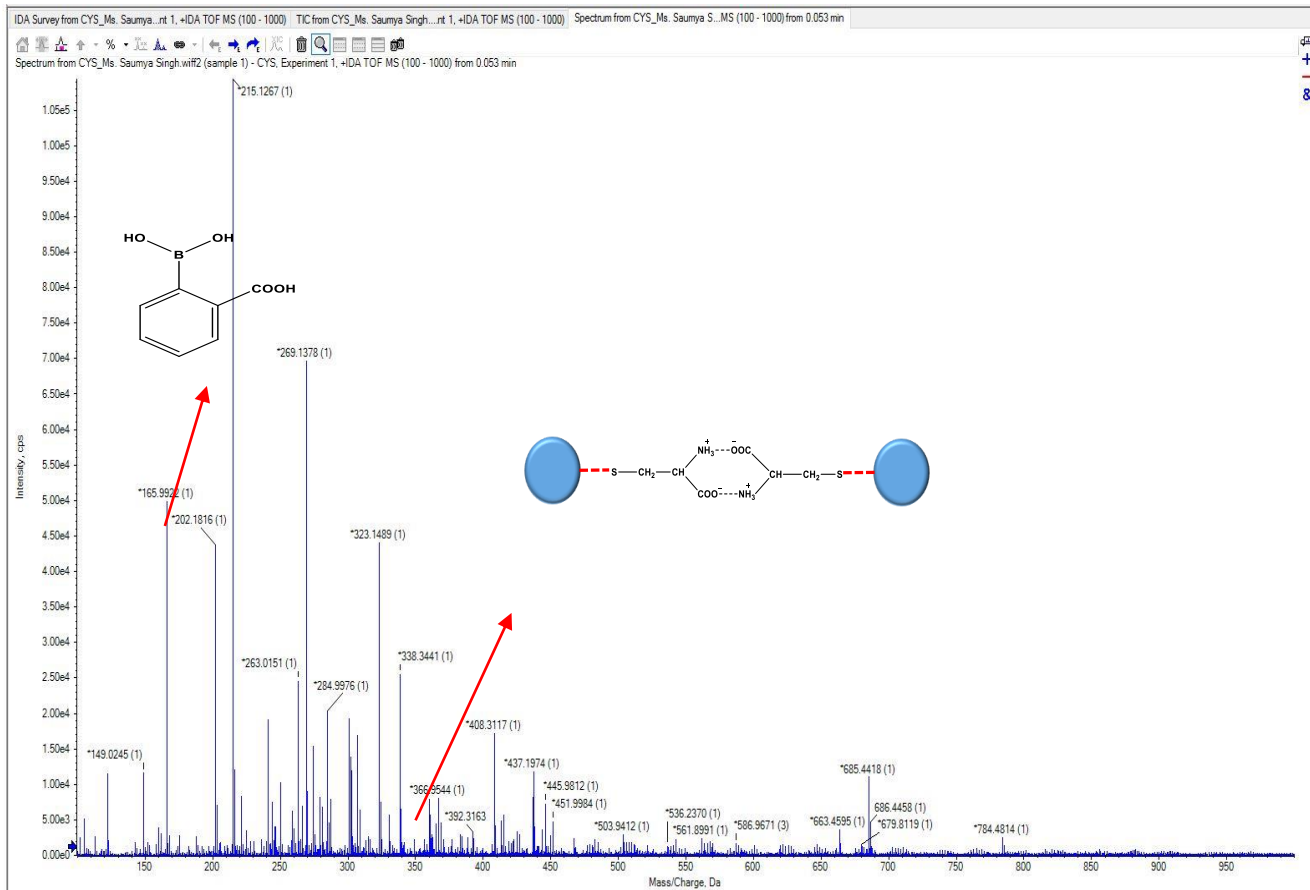

**Fig. S10:** HRMS of AgNCs+L-Cys

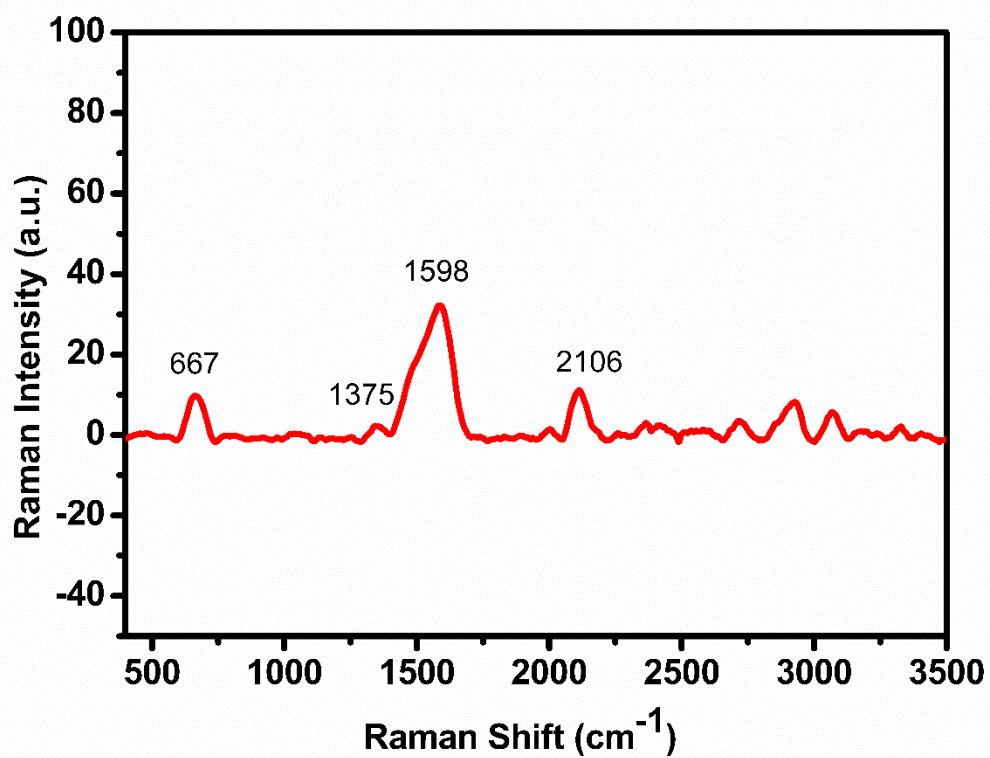

Fig. S11: Raman spectrum of AgNCs

Table S4. Raman wavenumbers ( $\text{cm}^{-1}$ ) and intensity (a.u.) and their probable assignments.

| Wavenumber ( $\text{cm}^{-1}$ ) | Intensity (a.u.) | Probable assignment             |
|---------------------------------|------------------|---------------------------------|
| 667                             | 20               | C-B-O out of plane bending      |
| 1371                            | 36               | B-C                             |
| 1598                            | 60               | Aromatic C-C                    |
| 2106                            | 10               | Intramolecular hydrogen bonding |

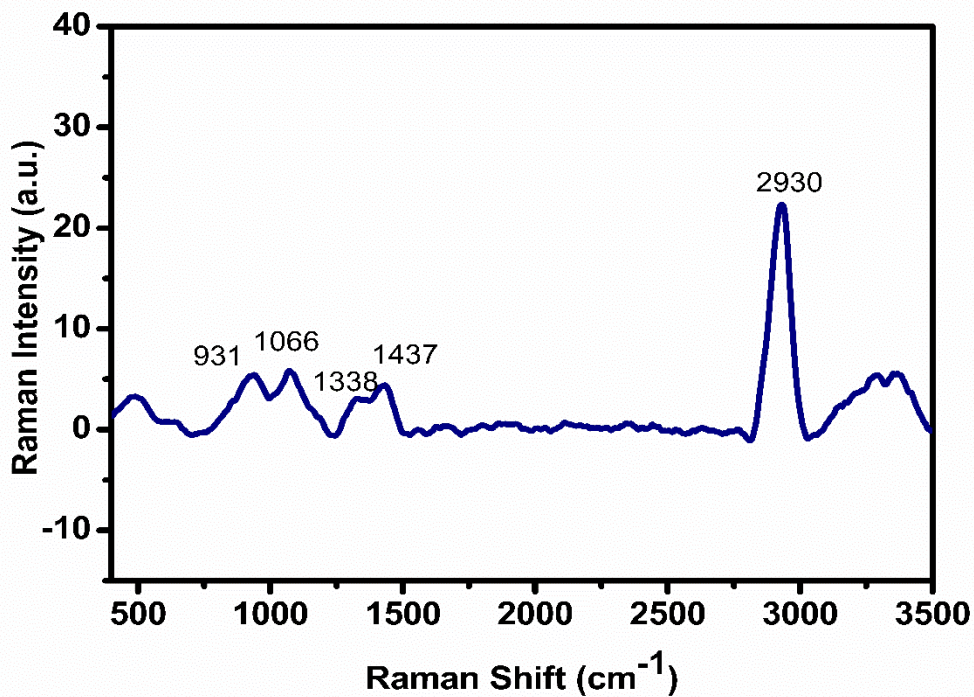

Fig. S12 Raman spectrum of L-Arg

**Table S5.** Raman and SERS wavenumbers (cm<sup>-1</sup>) and relative intensities (a.u.) and their probable assignments corresponding to Fig. 6a (Main Text).

| Raman (cm <sup>-1</sup> ) | Relative Intensity (a.u.) | SERS (cm <sup>-1</sup> ) | Relative Intensity (a.u.) |     |     |     |     | Most Probable Assignment       |
|---------------------------|---------------------------|--------------------------|---------------------------|-----|-----|-----|-----|--------------------------------|
|                           |                           |                          | A                         | B   | C   | D   | E   |                                |
| 931                       | 138                       | 1029                     | 207                       | 271 | 382 | 550 | 689 | $\nu$ C-COO-                   |
| 1066                      | 134                       | 1122                     | 191                       | 259 | 354 | 517 | 668 | $\nu$ CN                       |
| 1338                      | 127                       | 1332                     | 221                       | 290 | 396 | 562 | 784 | $\omega$ CH <sub>2</sub>       |
| 1437                      | 134                       | 1568                     | 216                       | 304 | 443 | 599 | 850 | NH $\delta$ guanidium fragment |
| 2930                      | 157                       | 2914                     | 205                       | 276 | 382 | 545 | 715 | $\nu$ CH                       |

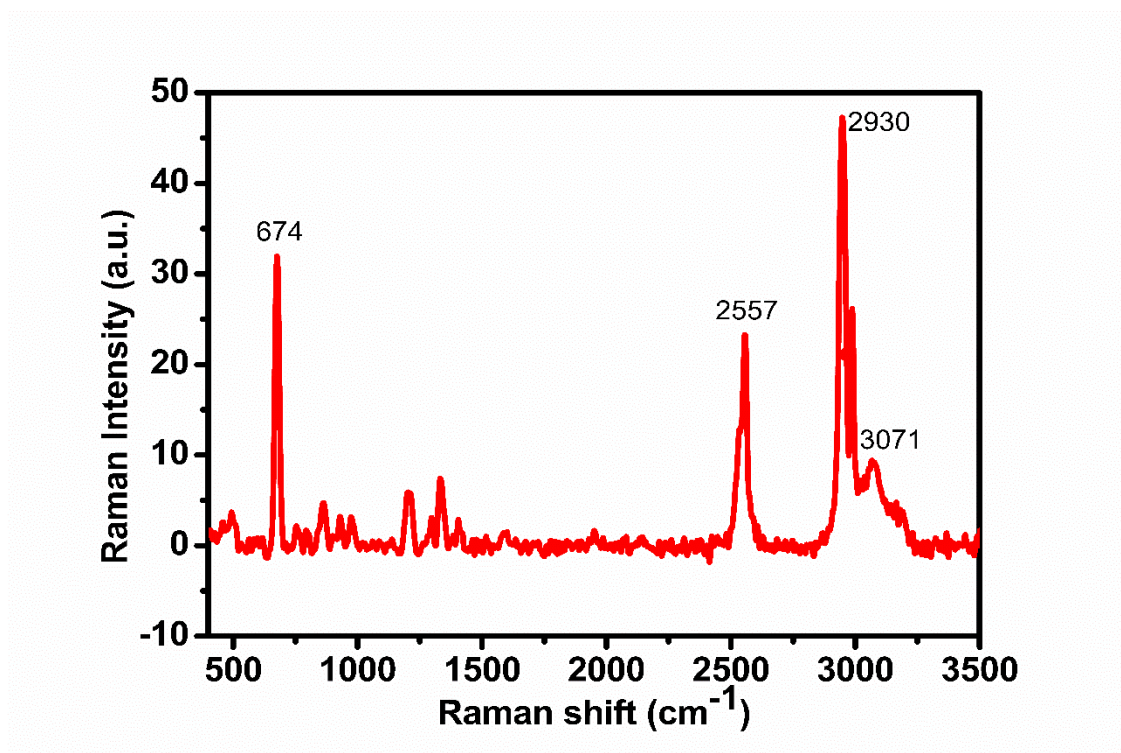

Fig. S13 Raman spectrum of L-Cys

**Table S6.** Raman and SERS wavenumbers (cm<sup>-1</sup>) and relative intensities (a.u.) and their probable assignments corresponding to Fig. 6a (Main Text).

| Raman (cm <sup>-1</sup> ) | Relative Intensity (a.u.) | SERS (cm <sup>-1</sup> ) | Relative Intensity (a.u.) |     |     |     |     | Most Probable Assignment |
|---------------------------|---------------------------|--------------------------|---------------------------|-----|-----|-----|-----|--------------------------|
|                           |                           |                          | A                         | B   | C   | D   | E   |                          |
| 674                       | 148                       | 504                      | 241                       | 333 | 462 | 568 | 686 | v C-S                    |
| 2557                      | 136                       | -                        | -                         | -   | -   | -   | -   | v S-H                    |
| 2930                      | 163                       | 2916                     | 246                       | 360 | 462 | 565 | 698 | v C-H                    |
| 3071                      | 144                       | 2962                     | 215                       | 322 | 418 | 530 | 648 | v N-H                    |



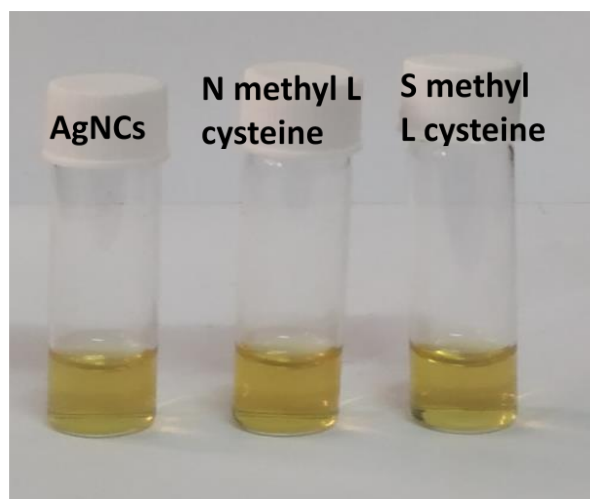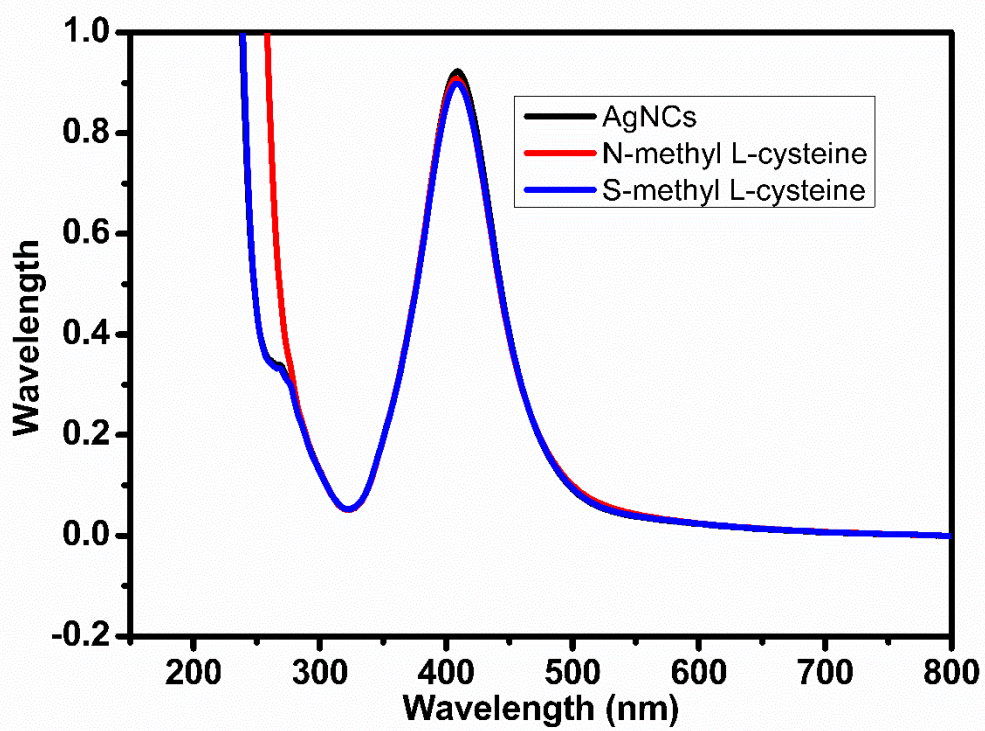

**Fig. S14** Visual response and corresponding UV-Vis spectra after addition of N-methyl L-Cysteine and S- Methyl L Cysteine into AgNCs.



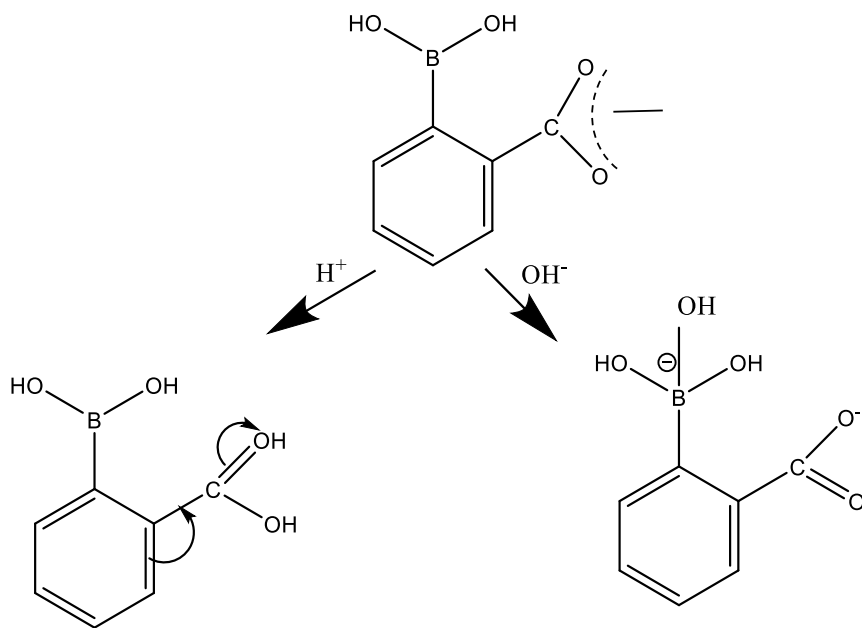

Destabilises the benzenoid structure  
hence possibly gets removed from  
AgNCs

The occurrence of one -ve charge  
over B atom destabilizes the  
system hence might be getting  
AgNCs surface

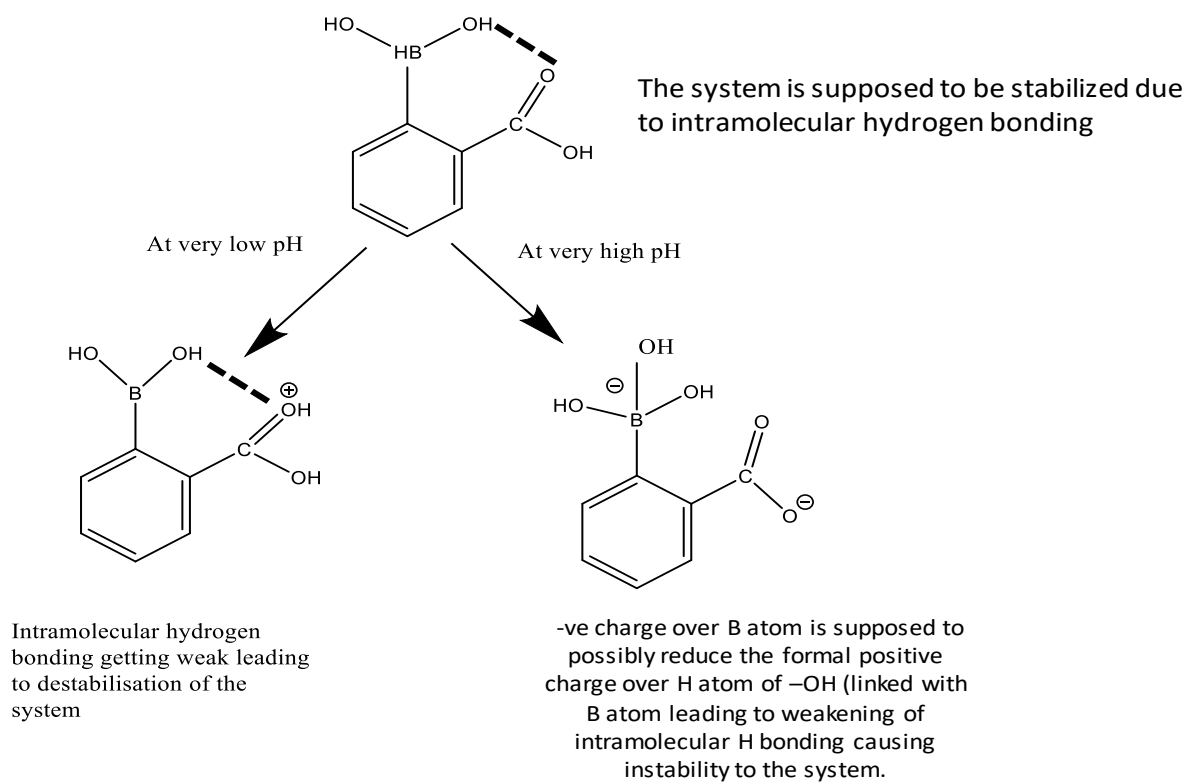

Fig. S15 Probable mechanism for change in optical properties at very high and very low pH.
